# Supplementary material
Source: PubMed Central journal article supplement (PMC6172598)
Supplement: ofx173_suppl_table_s1.pdf [file ofx173_suppl_table_s1.pdf]

**Table S1. Number of sequences obtained for each participant, time point, and tissue <sup>a</sup>**

|                                                                                                                          | PID 1774                 |    |    |    |    |    | PID 1727 |    |    |    |    |    | PID 1679 |    |    |    |   |    |    |    |    |
|--------------------------------------------------------------------------------------------------------------------------|--------------------------|----|----|----|----|----|----------|----|----|----|----|----|----------|----|----|----|---|----|----|----|----|
| Tissue                                                                                                                   | PL                       | PB |    |    | LN |    |          | PL | PB |    |    | LN |          |    | PL | PB |   |    | LN |    |    |
| Time point                                                                                                               | 0                        | 0  | 3  | 6  | 0  | 3  | 6        | 0  | 0  | 3  | 6  | 0  | 3        | 6  | 0  | 0  | 3 | 6  | 0  | 3  | 6  |
| Step in Pipeline:                                                                                                        | Number of gag Sequences: |    |    |    |    |    |          |    |    |    |    |    |          |    |    |    |   |    |    |    |    |
| Align sequences from within each sample                                                                                  | 32                       | 36 | 59 | 37 | 44 | 15 | 39       | 11 | 45 | 19 | 43 | 15 | 46       | 16 | 37 | 23 | 0 | 17 | 16 | 32 | 24 |
| Collapse identical sequences that likely result from clonal expansion or PCR resampling (Number of unique gag sequences) | 5                        | 7  | 6  | 5  | 9  | 4  | 5        | 4  | 37 | 1  | 4  | 2  | 5        | 3  | 5  | 4  | 0 | 6  | 4  | 13 | 7  |
| Translate alignments, omit sequences that have stop codons                                                               | 5                        | 7  | 5  | 5  | 9  | 4  | 5        | 4  | 37 | 0  | 0  | 2  | 5        | 1  | 5  | 3  | 0 | 2  | 4  | 5  | 0  |

<sup>a</sup> The *gag* sequences from Lorenzo-Redondo *et al.* were downloaded from GenBank (Accession Numbers KT829617–KT831260) and processed as indicated above, using an in-house program to collapse identical sequences and remove sequences with stop codons.
